# Supplementary material for: Investigating Eating Habits of Children Aged between 6 Months and 3 Years in the Provinces of Modena and Reggio Emilia: Is Our Kids’ Diet Sustainable for Their and the Planet’s Health?
Source: MDPI journal article supplement (doi:10.3390/healthcare12040453), 2024-02-10
Supplement: s1 [file s1]

# **Investigating Eating Habits of Children Aged Between 6 Months and 3 Years in The Province of Modena and Reggio Emilia: Is Our Kids Diet Sustainable for Their and the Planet's Health?**

Lucia Palandri<sup>1,2\*</sup> †, Laura Rocca<sup>3</sup> †, Maria Rosaria Scasserra<sup>1</sup>, Giacomo Pietro Vigezzi<sup>4,5</sup>, Anna Odone<sup>4</sup>, Lorenzo Iughetti<sup>3,6</sup>, Laura Lucaccioni<sup>3</sup> and Elena Righi<sup>1</sup>

## **Supplementary material**

**Figure S1:**

Estimation of of the optimal number of clusters was performed using the Silhouette method for describing adherence clustering for main food categories without accounting for school meals

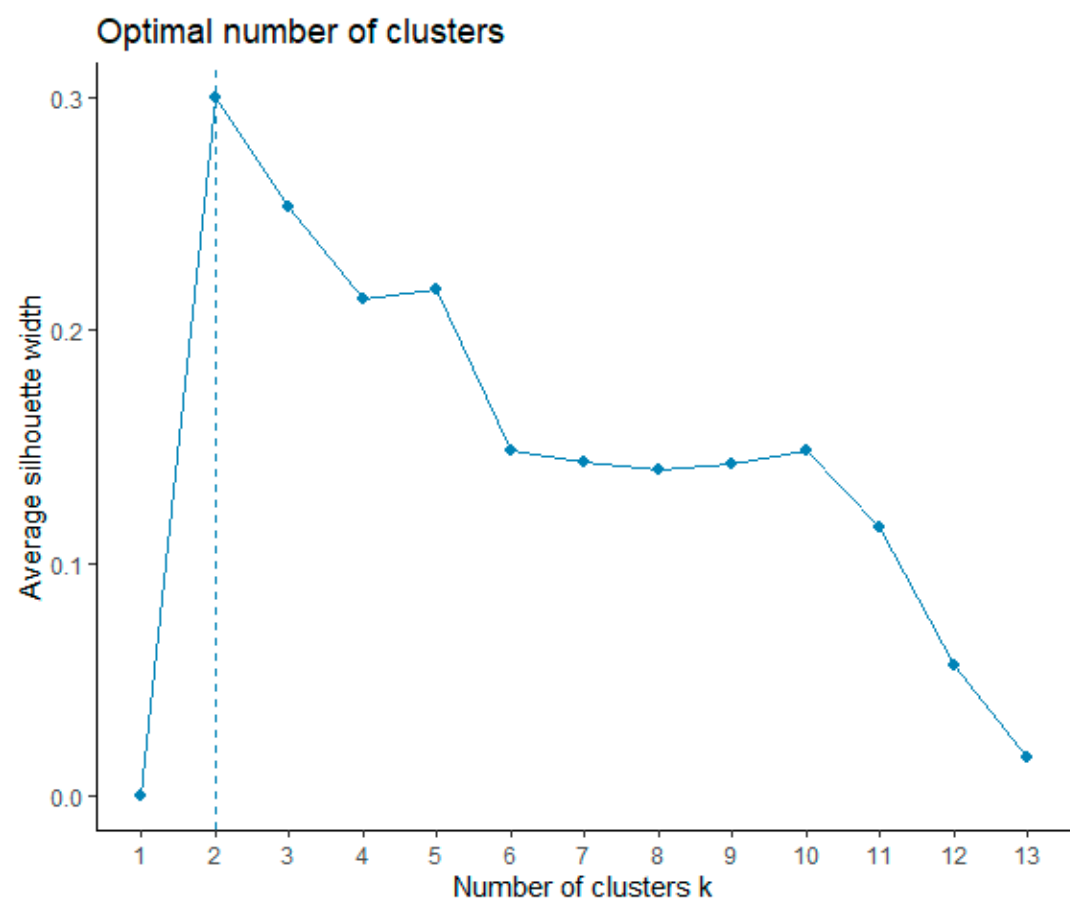

## Figure S2:

Estimation of the optimal number of clusters was performed using the Silhouette method for describing adherence clustering for main food categories without accounting for school meals

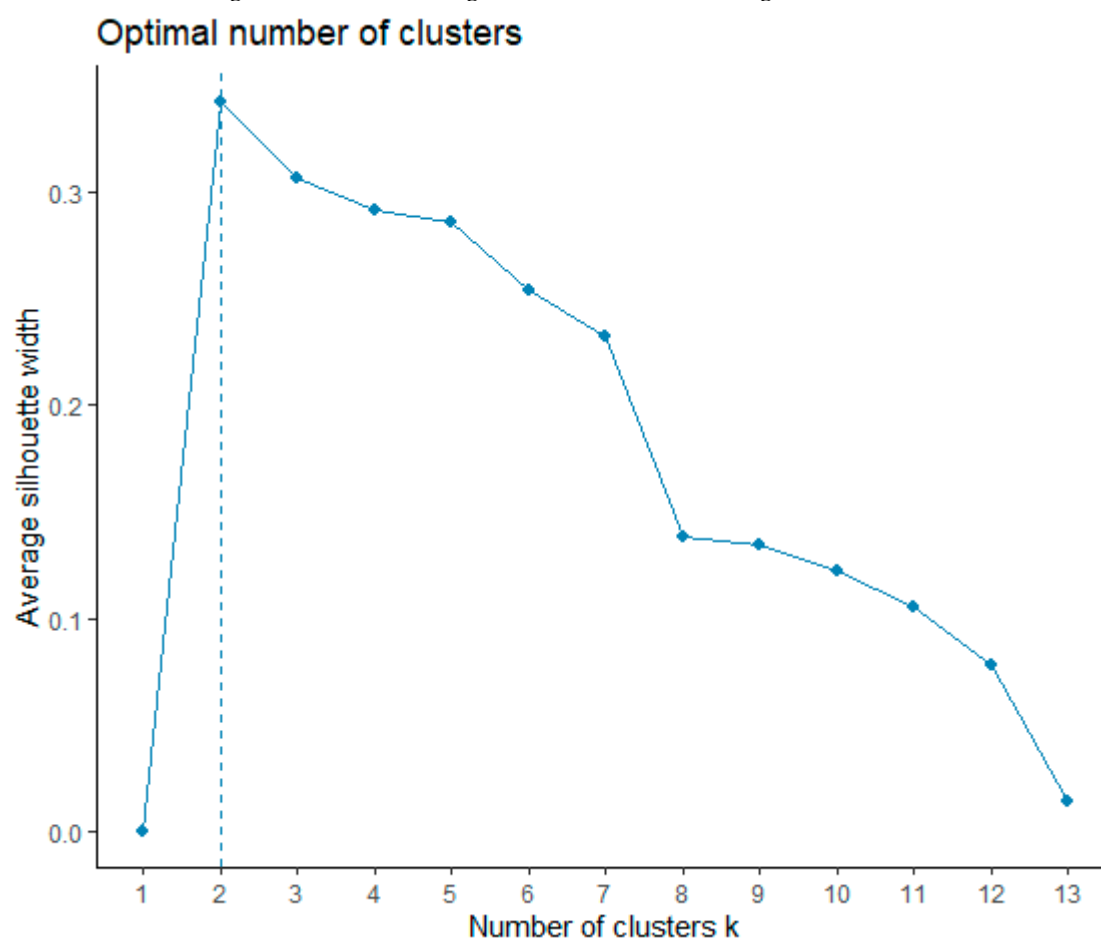

# Table S1.

Children's food frequency consumption for all the food categories in the overall sample and divided by age categories. *Total Cereals*: pasta, bread, rice, other cereals (barley, spelt, corn, quinoa, buckweat, oat, kamut), bread substitutes (crackers, breadsticks), breakfast cereals. *Total Meat*: red meat (beef, veal, pork, sheep, goat, game meat, red meat in the pasta sauce), white meat (chicken, turkey, rabbit, white meat in the pasta sauce). *Processed Meat*: cured meat, dried meat, cooked ham, salami, bresaola, sausage, industrial burgers. *Fish*: fresh fish, frozen fish, clams, crustaceans. *Legumes*: beans, peas, chickpeas, lentils, grass peas. *Total Cheese*: light cheese, with less than 25% fat (mozzarella, stracchino, crescenza, ricotta, provola), fatty cheese, with more than 25% fat (robiola, caciotta cheese, aged cheese). *Vegetables*: fresh vegetables, leafy salads (excluding potatoes). *Sweets*: ice cream, pudding, candies, nutella, chocolate, bakery products (cake, tarts, croissants, biscuits). *Sugary Soft Drinks*: fruit juice, orange soda, sweet tea, coke soda. *Processed Food*: sweet snacks, savory snacks, potato chips, ready-to-eat and pre-cooked food, fish sticks, fast food, fruit in syrup.

|                        |              | Tot = 218 | 6-1y = 66 | 2-3 yrs = 152 | p-value |
|------------------------|--------------|-----------|-----------|---------------|---------|
| <b>Total Cereals</b>   | 2-3 per day  | 147 (67%) | 53 (80%)  | 94 (62%)      | 0.004   |
|                        | 1 per day    | 29 (13%)  | 10 (15%)  | 19 (13%)      |         |
|                        | Almost daily | 35 (16%)  | 3 (5%)    | 32 (21%)      |         |
|                        | 3-5 per week | 5 (2%)    | 0 (0%)    | 5 (3%)        |         |
|                        | 2 per week   | 2 (1%)    | 0 (0%)    | 2 (1%)        |         |
|                        |              |           |           |               |         |
| <b>Pasta and Bread</b> | 1-2 per day  | 134 (61%) | 48 (73%)  | 86 (57%)      | 0.026   |
|                        | 4-6 per week | 59 (27%)  | 15 (23%)  | 44 (29%)      |         |
|                        | 2-3 per week | 20 (9%)   | 2 (3%)    | 18 (12%)      |         |
|                        | 1 per week   | 1 (2%)    | 0 (0%)    | 4 (3%)        |         |
|                        | Rarely/never | 1 (1%)    | 1 (2%)    | 0 (0%)        |         |
|                        |              |           |           |               |         |
| <b>Rice</b>            | 1-2 per day  | 23 (11%)  | 8 (12%)   | 15 (10%)      | 0.2     |
|                        | 4-6 per week | 7 (3%)    | 4 (6%)    | 3 (2%)        |         |
|                        | 2-3 per week | 87 (40%)  | 20 (30%)  | 67 (44%)      |         |
|                        | 1 per week   | 76 (35%)  | 25 (38%)  | 51 (34%)      |         |
|                        | Rarely/never | 25 (11%)  | 9 (14%)   | 16 (11%)      |         |
|                        |              |           |           |               |         |
| <b>Other Cereals</b>   | 1-2 per day  | 18 (8%)   | 8 (12%)   | 10 (7%)       | 0.3     |
|                        | 4-6 per week | 11 (5%)   | 5 (8%)    | 6 (4%)        |         |
|                        | 2-3 per week | 65 (30%)  | 15 (23%)  | 50 (33%)      |         |
|                        | 1 per week   | 55 (25%)  | 17 (38%)  | 38 (25%)      |         |
|                        | Rarely/never | 69 (32%)  | 21 (32%)  | 48 (32%)      |         |
|                        |              |           |           |               |         |
| <b>Total Meat</b>      | 1-2 per day  | 28 (13%)  | 12 (18%)  | 16 (11%)      | 0.2     |
|                        | Almost daily | 31 (14%)  | 10 (15%)  | 21 (14%)      |         |
|                        | 4 per week   | 79 (36%)  | 23 (35%)  | 56 (37%)      |         |
|                        | 3 per week   | 37 (17%)  | 10 (15%)  | 27 (18%)      |         |
|                        | 2 per week   | 30 (14%)  | 6 (9%)    | 24 (16%)      |         |
|                        | 1 per week   | 7 (3%)    | 1 (2%)    | 6 (4%)        |         |
|                        | Rarely/never | 28 (13%)  | 12 (18%)  | 16 (11%)      |         |
|                        |              |           |           |               |         |
|                        |              |           |           |               |         |
| <b>Red Meat</b>        | Almost daily | 4 (2%)    | 3 (5%)    | 1 (1%)        | 0.074   |
|                        | 4-5 per week | 6 (3%)    | 2 (3%)    | 4 (3%)        |         |
|                        | 2-3 per week | 67 (31%)  | 21 (32%)  | 46 (30%)      |         |
|                        | 1 per week   | 102 (47%) | 24 (36%)  | 78 (51%)      |         |
|                        | Rarely/never | 39 (18%)  | 16 (24%)  | 23 (15%)      |         |
|                        |              |           |           |               |         |
| <b>White Meat</b>      |              |           |           |               | <0.001  |

|                        |              |           |          |           |       |
|------------------------|--------------|-----------|----------|-----------|-------|
|                        | Almost daily | 9 (4%)    | 7 (11%)  | 2 (1%)    |       |
|                        | 4-5 per week | 12 (6%)   | 8 (12%)  | 4 (3%)    |       |
|                        | 2-3 per week | 111 (51%) | 34 (52%) | 77 (51%)  |       |
|                        | 1 per week   | 70 (32%)  | 12 (18%) | 58 (38%)  |       |
|                        | Rarely/never | 16 (7%)   | 5 (8%)   | 11 (7%)   |       |
| <b>Processed Meat</b>  |              |           |          |           | 0.004 |
|                        | Almost daily | 3 (1%)    | 3 (5%)   | 0 (0%)    |       |
|                        | 4-5 per week | 5 (2%)    | 1 (2%)   | 4 (3%)    |       |
|                        | 2-3 per week | 21 (10%)  | 4 (6%)   | 17 (11%)  |       |
|                        | 1 per week   | 92 (42%)  | 20 (30%) | 72 (47%)  |       |
|                        | Rarely/never | 97 (44%)  | 38 (58%) | 59 (39%)  |       |
| <b>Fish</b>            |              |           |          |           | 0.5   |
|                        | 4-5 per week | 8 (4%)    | 3 (5%)   | 5 (3%)    |       |
|                        | 2-3 per week | 107 (49%) | 37 (56%) | 70 (46%)  |       |
|                        | 1 per week   | 88 (40%)  | 22 (33%) | 66 (43%)  |       |
|                        | Rarely/never | 15 (7%)   | 4 (6%)   | 11 (7%)   |       |
| <b>Legumes</b>         |              |           |          |           | 0.001 |
|                        | Almost daily | 11 (5%)   | 6 (9%)   | 5 (3%)    |       |
|                        | 4-5 per week | 25 (11%)  | 15 (23%) | 10 (7%)   |       |
|                        | 2-3 per week | 108 (50%) | 28 (42%) | 80 (53%)  |       |
|                        | 1 per week   | 58 (27%)  | 11 (17%) | 47 (31%)  |       |
|                        | Rarely/never | 16 (7%)   | 6 (9%)   | 10 (7%)   |       |
| <b>Total Cheese</b>    |              |           |          |           | 0.12  |
|                        | 1 per day    | 77 (35%)  | 32 (48%) | 45 (30%)  |       |
|                        | Almost daily | 34 (16%)  | 9 (14%)  | 25 (16%)  |       |
|                        | 4-5 per week | 13 (6%)   | 2 (3%)   | 11 (7%)   |       |
|                        | 3-4 per week | 42 (19%)  | 8 (12%)  | 34 (22%)  |       |
|                        | 2-3 per week | 27 (12%)  | 7 (11%)  | 20 (13%)  |       |
|                        | 1-2 per week | 25 (11%)  | 8 (12%)  | 17 (11%)  |       |
| <b>Light Cheese</b>    |              |           |          |           | 0.14  |
|                        | Almost daily | 3 (1%)    | 2 (3%)   | 1 (1%)    |       |
|                        | 4-5 per week | 6 (3%)    | 4 (6%)   | 2 (1%)    |       |
|                        | 2-3 per week | 57 (26%)  | 14 (21%) | 43 (28%)  |       |
|                        | 1 per week   | 106 (49%) | 31 (47%) | 75 (49%)  |       |
|                        | Rarely/never | 46 (21%)  | 15 (23%) | 31 (20%)  |       |
| <b>Fatty Cheese</b>    |              |           |          |           | >0.9  |
|                        | Almost daily | 1 (1%)    | 0 (0%)   | 1 (1%)    |       |
|                        | 4-5 per week | 3 (1%)    | 1 (2%)   | 2 (1%)    |       |
|                        | 2-3 per week | 19 (9%)   | 6 (9%)   | 13 (9%)   |       |
|                        | 1 per week   | 88 (40%)  | 26 (39%) | 62 (41%)  |       |
|                        | Rarely/never | 107 (49%) | 33 (50%) | 74 (49%)  |       |
| <b>Parmesan Cheese</b> |              |           |          |           | 0.055 |
|                        | Almost daily | 63 (29%)  | 27 (41%) | 36 (24%)  |       |
|                        | 4-5 per week | 41 (19%)  | 14 (21%) | 27 (18%)  |       |
|                        | 2-3 per week | 66 (30%)  | 13 (20%) | 53 (35%)  |       |
|                        | 1 per week   | 38 (17%)  | 10 (15%) | 28 (18%)  |       |
|                        | Rarely/never | 10 (5%)   | 2 (3%)   | 8 (5%)    |       |
| <b>Melted Cheeses</b>  |              |           |          |           | 0.6   |
|                        | Almost daily | 4 (2%)    | 2 (3%)   | 2 (1%)    |       |
|                        | 4-5 per week | 6 (3%)    | 2 (3%)   | 4 (3%)    |       |
|                        | 2-3 per week | 20 (9%)   | 5 (8%)   | 15 (10%)  |       |
|                        | 1 per week   | 40 (18%)  | 15 (23%) | 25 (16%)  |       |
|                        | Rarely/never | 148 (68%) | 42 (64%) | 106 (70%) |       |

|                       |                   |           |          |           |        |
|-----------------------|-------------------|-----------|----------|-----------|--------|
| <b>Vegetables</b>     |                   |           |          |           | <0.001 |
|                       | 1-2 per day       | 108 (50%) | 48 (73%) | 60 (39%)  |        |
|                       | 1 per day         | 39 (18%)  | 5 (8%)   | 34 (22%)  |        |
|                       | 4-6 per week      | 42 (19%)  | 10 (15%) | 32 (21%)  |        |
|                       | 2-3 per week      | 20 (9%)   | 2 (3%)   | 18 (12%)  |        |
|                       | 1 per week        | 5 (2%)    | 0 (0%)   | 5 (3%)    |        |
|                       | Rarely/never      | 4 (2%)    | 1 (2%)   | 3 (2%)    |        |
| <b>Fresh fruit</b>    |                   |           |          |           | 0.080  |
|                       | 1-2 per day       | 121 (56%) | 44 (67%) | 77 (51%)  |        |
|                       | 1 per day         | 49 (22%)  | 9 (14%)  | 40 (26%)  |        |
|                       | 4-6 per week      | 29 (13%)  | 8 (12%)  | 21 (14%)  |        |
|                       | 2-3 per week      | 10 (5%)   | 2 (3%)   | 8 (5%)    |        |
|                       | 1 per week        | 4 (2%)    | 0 (0%)   | 4 (3%)    |        |
|                       | Rarely/never      | 5 (2%)    | 3 (5%)   | 2 (1%)    |        |
| <b>Dried fruit</b>    |                   |           |          |           | 0.001  |
|                       | 1-2 per day       | 5 (2%)    | 4 (6%)   | 1 (1%)    |        |
|                       | 1 per day         | 31 (14%)  | 6 (9%)   | 25 (16%)  |        |
|                       | 4-6 per week      | 24 (11%)  | 2 (3%)   | 22 (14%)  |        |
|                       | 2-3 per week      | 22 (10%)  | 6 (9%)   | 16 (11%)  |        |
|                       | Rarely/never      | 95 (44%)  | 39 (59%) | 56 (37%)  |        |
| <b>Milk (cow)</b>     |                   |           |          |           | <0.001 |
|                       | > 2 per day       | 10 (5%)   | 0 (0%)   | 10 (7%)   |        |
|                       | 1-2 per day       | 72 (33%)  | 9 (14%)  | 63 (41%)  |        |
|                       | 4-6 per week      | 17 (8%)   | 2 (3%)   | 15 (10%)  |        |
|                       | 2-3 per week      | 15 (7%)   | 2 (3%)   | 13 (9%)   |        |
|                       | 1 per week        | 14 (6%)   | 3 (5%)   | 11 (7%)   |        |
|                       | Rarely/never      | 90 (41%)  | 50 (76%) | 40 (26%)  |        |
| <b>Follow-on milk</b> |                   |           |          |           | <0.001 |
|                       | > 2 per day       | 13 (6%)   | 9 (14%)  | 4 (3%)    |        |
|                       | 1-2 per day       | 19 (9%)   | 11 (17%) | 8 (5%)    |        |
|                       | 4-6 per week      | 4 (2%)    | 1 (2%)   | 3 (2%)    |        |
|                       | 2-3 per week      | 4 (2%)    | 2 (3%)   | 2 (1%)    |        |
|                       | 1 per week        | 2 (1%)    | 0 (0%)   | 2 (1%)    |        |
|                       | Rarely/never      | 176 (81%) | 43 (65%) | 133 (88%) |        |
| <b>Yogurt</b>         |                   |           |          |           | 0.11   |
|                       | > 2 per day       | 4 (2%)    | 0 (0%)   | 4 (3%)    |        |
|                       | 1-2 per day       | 28 (13%)  | 9 (14%)  | 19 (13%)  |        |
|                       | 4-6 per week      | 40 (18%)  | 12 (18%) | 28 (18%)  |        |
|                       | 2-3 per week      | 77 (35%)  | 24 (36%) | 53 (35%)  |        |
|                       | 1 per week        | 40 (18%)  | 7 (11%)  | 33 (22%)  |        |
|                       | Rarely/never      | 29 (13%)  | 14 (21%) | 15 (10%)  |        |
| <b>Eggs</b>           |                   |           |          |           | 0.3    |
|                       | Almost daily      | 1 (1%)    | 0 (0%)   | 1 (1%)    |        |
|                       | 3-5 eggs per week | 2 (1%)    | 1 (2%)   | 1 (1%)    |        |
|                       | 2 eggs per week   | 50 (23%)  | 11 (17%) | 39 (26%)  |        |
|                       | 1 egg per week    | 123 (56%) | 37 (56%) | 86 (57%)  |        |
|                       | Rarely/never      | 42 (19%)  | 17 (26%) | 25 (16%)  |        |
| <b>Sweets</b>         |                   |           |          |           | <0.001 |
|                       | 1-2 per day       | 3 (1%)    | 0 (0%)   | 3 (2%)    |        |
|                       | Almost daily      | 21 (10%)  | 1 (2%)   | 20 (13%)  |        |
|                       | 3-5 per week      | 33 (15%)  | 6 (9%)   | 27 (18%)  |        |
|                       | 1-2 per week      | 71 (33%)  | 6 (9%)   | 65 (43%)  |        |

|                          |             |              |           |          |           |        |
|--------------------------|-------------|--------------|-----------|----------|-----------|--------|
| <i>Sugary<br/>Drinks</i> | <i>Soft</i> | Rarely/never | 90 (41%)  | 53 (80%) | 37 (24%)  | <0.001 |
|                          |             | Almost daily | 4 (2%)    | 0 (0%)   | 4 (3%)    |        |
|                          |             | 3-5 per week | 13 (6%)   | 0 (0%)   | 13 (9%)   |        |
|                          |             | 1-2 per week | 35 (16%)  | 5 (8%)   | 30 (20%)  |        |
|                          |             | Rarely/never | 166 (76%) | 61 (92%) | 105 (69%) |        |
| <i>Processed Food</i>    |             |              |           |          |           | <0.001 |
|                          |             | 1-2 per day  | 3 (1%)    | 0 (0%)   | 3 (2%)    |        |
|                          |             | 3-5 per week | 18 (9%)   | 1 (2%)   | 17 (12%)  |        |
|                          |             | 1-2 per week | 55 (26%)  | 7 (11%)  | 48 (33%)  |        |
|                          |             | Rarely/Never | 136 (64%) | 58 (88%) | 78 (53%)  |        |
|                          |             | Unknown      | 6         | 0        | 6         |        |

---

# Table S2.

Adherence to food consumption recommended by the Italian guidelines for healthy eating (CREA 2018) for the main food categories calculated including standard school meals to those children who had lunch at school, overall and stratified by age categories.

\* Expressed as median (IQR).

|                                 | <b>Tot = 218 (%)</b> | <b>6 m – 1 y = 66</b> | <b>2 – 3 yrs = 152</b> | <b>p-value</b> |
|---------------------------------|----------------------|-----------------------|------------------------|----------------|
| <b>Overall Adherence score*</b> | 8.00 (6.00 – 9.00)   | 7.50 (6.00, 8.00)     | 8.00 (6.00, 9.00)      | 0.5            |
| <b>Cereals Adherence</b>        |                      |                       |                        | > 0.9          |
| Less than GL                    | 2 (1%)               | 0 (0%)                | 2 (1%)                 |                |
| According to GL                 | 216 (99%)            | 66 (100%)             | 150 (99%)              |                |
| <b>Meat Adherence</b>           |                      |                       |                        | 0.003          |
| Less than GL                    | 11 (5%)              | 8 (12%)               | 3 (2%)                 |                |
| According to GL                 | 14 (6%)              | 6 (9%)                | 8 (5%)                 |                |
| More than GL                    | 193 (89%)            | 52 (79%)              | 141 (93%)              |                |
| <b>Fish Adherence</b>           |                      |                       |                        | 0.3            |
| Less than GL                    | 103 (47%)            | 26 (39%)              | 77 (51%)               |                |
| According to GL                 | 107 (49%)            | 37 (56%)              | 70 (46%)               |                |
| More than GL                    | 8 (4%)               | 3 (5%)                | 5 (3%)                 |                |
| <b>Legumes Adherence</b>        |                      |                       |                        | < 0.001        |
| Less than GL                    | 25 (11%)             | 12 (18%)              | 13 (9%)                |                |
| According to GL                 | 157 (72%)            | 33 (50%)              | 124 (82%)              |                |
| More than GL                    | 36 (17%)             | 21 (32%)              | 15 (10%)               |                |
| <b>Cheeses Adherence</b>        |                      |                       |                        | 0.036          |
| Less than GL                    | 7 (3%)               | 5 (8%)                | 2 (1%)                 |                |
| According to GL                 | 30 (14%)             | 11 (17%)              | 19 (13%)               |                |
| More than GL                    | 181 (83%)            | 50 (76%)              | 131 (86%)              |                |
| <b>Vegetables Adherence</b>     |                      |                       |                        | 0.6            |
| Less than GL                    | 45 (21%)             | 12 (18%)              | 33 (22%)               |                |
| According to GL                 | 173 (79%)            | 54 (82%)              | 119 (78%)              |                |
| <b>Fresh Fruit Adherence</b>    |                      |                       |                        | 0.077          |
| Less than GL                    | 35 (16%)             | 15 (23%)              | 20 (13%)               |                |
| According to GL                 | 183 (84%)            | 44 (67%)              | 77 (51%)               |                |
| <b>Dried Fruit Adherence</b>    |                      |                       |                        | 0.095          |
| Less than GL                    | 136 (62%)            | 48 (73%)              | 88 (58%)               |                |
| According to GL                 | 22 (10%)             | 6 (9%)                | 16 (11%)               |                |
| More than GL                    | 60 (28%)             | 12 (18%)              | 48 (32%)               |                |
| <b>Milk Adherence</b>           |                      |                       |                        | < 0.001        |
| Less than GL                    | 136 (62%)            | 57 (86%)              | 79 (52%)               |                |
| According to GL                 | 72 (33%)             | 9 (14%)               | 63 (41%)               |                |
| More than GL                    | 10 (5%)              | 0 (0%)                | 10 (7%)                |                |
| <b>Yogurt Adherence</b>         |                      |                       |                        | 0.001          |
| Less than GL                    | 158 (72%)            | 57 (86%)              | 101 (66%)              |                |
| According to GL                 | 37 (17%)             | 9 (14%)               | 28 (18%)               |                |
| More than GL                    | 23 (11%)             | 0 (0%)                | 23 (15%)               |                |
| <b>Eggs Adherence</b>           |                      |                       |                        | < 0.001        |
| Less than GL                    | 73 (33%)             | 40 (61%)              | 33 (22%)               |                |
| According to GL                 | 97 (44%)             | 18 (27%)              | 79 (52%)               |                |
| More than GL                    | 48 (22%)             | 8 (12%)               | 40 (26%)               |                |
| <b>Sweets Adherence</b>         |                      |                       |                        | < 0.001        |
| According to GL                 | 161 (74%)            | 59 (89%)              | 102 (67%)              |                |
| More than GL                    | 57 (26%)             | 7 (11%)               | 50 (33%)               |                |



|                                 |           |          |           |         |
|---------------------------------|-----------|----------|-----------|---------|
| <b>Soft Drinks Adherence</b>    |           |          |           | < 0.001 |
| According to GL                 | 161 (74%) | 59 (89%) | 102 (67%) |         |
| More than GL                    | 57 (26%)  | 7 (11%)  | 50 (33%)  |         |
| <b>Processed Food Adherence</b> |           |          |           | < 0.001 |
| According to GL                 | 136 (62%) | 58 (88%) | 78 (51%)  |         |
| More than GL                    | 82 (38%)  | 8 (12%)  | 74 (49%)  |         |

---

## Table S3:

Jaccard Index Matrix for adherence clustering for main food categories without accounting for school meals and representing food categories adherence co-occurrence. Co-occurrence was calculated using the Jaccard Similarity index, where 0 represents when 2 food categories adherence never occur together and 1 if they always appear together.

|                 | Cereals | Meat  | Fish  | Legumes | Cheese | Vegetables | Fruits | Dried_Fruit | Cow_milk | Yogurt | Eggs  | Sweets | Sweet_drinks | Processed foods |
|-----------------|---------|-------|-------|---------|--------|------------|--------|-------------|----------|--------|-------|--------|--------------|-----------------|
| Cereals         | 1.000   | 0.159 | 0.500 | 0.477   | 0.302  | 0.498      | 0.551  | 0.104       | 0.341    | 0.159  | 0.231 | 0.730  | 0.762        | 0.621           |
| Meat            | 0.159   | 1.000 | 0.161 | 0.133   | 0.140  | 0.169      | 0.137  | 0.017       | 0.124    | 0.088  | 0.130 | 0.158  | 0.167        | 0.169           |
| Fish            | 0.500   | 0.161 | 1.000 | 0.352   | 0.197  | 0.387      | 0.425  | 0.093       | 0.252    | 0.161  | 0.246 | 0.497  | 0.460        | 0.350           |
| Legumes         | 0.477   | 0.133 | 0.352 | 1.000   | 0.246  | 0.376      | 0.405  | 0.102       | 0.295    | 0.189  | 0.264 | 0.408  | 0.405        | 0.356           |
| Cheese          | 0.302   | 0.140 | 0.197 | 0.246   | 1.000  | 0.264      | 0.258  | 0.083       | 0.195    | 0.128  | 0.167 | 0.264  | 0.277        | 0.273           |
| Vegetables      | 0.498   | 0.169 | 0.387 | 0.376   | 0.264  | 1.000      | 0.547  | 0.092       | 0.216    | 0.169  | 0.153 | 0.494  | 0.481        | 0.488           |
| Fruits          | 0.551   | 0.137 | 0.425 | 0.405   | 0.258  | 0.547      | 1.000  | 0.109       | 0.261    | 0.179  | 0.155 | 0.533  | 0.457        | 0.452           |
| Dried_Fruit     | 0.104   | 0.017 | 0.093 | 0.102   | 0.083  | 0.092      | 0.109  | 1.000       | 0.080    | 0.113  | 0.125 | 0.083  | 0.074        | 0.090           |
| Cow_milk        | 0.341   | 0.124 | 0.252 | 0.295   | 0.195  | 0.216      | 0.261  | 0.080       | 1.000    | 0.090  | 0.140 | 0.287  | 0.308        | 0.292           |
| Yogurt          | 0.159   | 0.088 | 0.161 | 0.189   | 0.128  | 0.169      | 0.179  | 0.113       | 0.090    | 1.000  | 0.160 | 0.158  | 0.147        | 0.146           |
| Eggs            | 0.231   | 0.130 | 0.246 | 0.264   | 0.167  | 0.153      | 0.155  | 0.125       | 0.140    | 0.160  | 1.000 | 0.220  | 0.207        | 0.177           |
| Sweets          | 0.730   | 0.158 | 0.497 | 0.408   | 0.264  | 0.494      | 0.533  | 0.083       | 0.287    | 0.158  | 0.220 | 1.000  | 0.703        | 0.659           |
| Sweet_drinks    | 0.762   | 0.167 | 0.460 | 0.405   | 0.277  | 0.481      | 0.457  | 0.074       | 0.308    | 0.147  | 0.207 | 0.703  | 1.000        | 0.669           |
| Processed foods | 0.621   | 0.169 | 0.350 | 0.356   | 0.273  | 0.488      | 0.452  | 0.090       | 0.292    | 0.146  | 0.177 | 0.659  | 0.669        | 1.000           |

## Table S4:

Jaccard Index Matrix for adherence clustering for main food categories accounting for school meals and representing food categories adherence co-occurrence. Co-occurrence was calculated using the Jaccard Similarity index, where 0 represents when 2 food categories adherence never occur together and 1 if they always appear together.

|                 | Cereals | Meat  | Fish  | Legumes | Cheese | Vegetables | Fruits | Dried_Fruit | Cow_milk | Yogurt | Eggs  | Sweets | Sweet_drinks | Processed foods |
|-----------------|---------|-------|-------|---------|--------|------------|--------|-------------|----------|--------|-------|--------|--------------|-----------------|
| Cereals         | 1.000   | 0.060 | 0.495 | 0.711   | 0.134  | 0.793      | 0.839  | 0.367       | 0.333    | 0.161  | 0.449 | 0.745  | 0.769        | 0.630           |
| Meat            | 0.060   | 1.000 | 0.034 | 0.043   | 0.100  | 0.063      | 0.065  | 0.067       | 0.024    | 0.085  | 0.037 | 0.067  | 0.071        | 0.095           |
| Fish            | 0.495   | 0.034 | 1.000 | 0.419   | 0.151  | 0.451      | 0.457  | 0.322       | 0.252    | 0.161  | 0.360 | 0.497  | 0.460        | 0.350           |
| Legumes         | 0.711   | 0.043 | 0.419 | 1.000   | 0.087  | 0.642      | 0.709  | 0.350       | 0.316    | 0.198  | 0.427 | 0.551  | 0.538        | 0.450           |
| Cheese          | 0.134   | 0.100 | 0.151 | 0.087   | 1.000  | 0.140      | 0.133  | 0.167       | 0.085    | 0.031  | 0.114 | 0.165  | 0.153        | 0.161           |
| Vegetables      | 0.793   | 0.063 | 0.451 | 0.642   | 0.140  | 1.000      | 0.798  | 0.371       | 0.296    | 0.160  | 0.459 | 0.678  | 0.646        | 0.601           |
| Fruits          | 0.839   | 0.065 | 0.457 | 0.709   | 0.133  | 0.798      | 1.000  | 0.387       | 0.328    | 0.176  | 0.466 | 0.646  | 0.646        | 0.556           |
| Dried_Fruit     | 0.367   | 0.067 | 0.322 | 0.350   | 0.167  | 0.371      | 0.387  | 1.000       | 0.176    | 0.202  | 0.288 | 0.328  | 0.292        | 0.298           |
| Cow_milk        | 0.333   | 0.024 | 0.252 | 0.316   | 0.085  | 0.296      | 0.328  | 0.176       | 1.000    | 0.090  | 0.363 | 0.287  | 0.308        | 0.292           |
| Yogurt          | 0.161   | 0.085 | 0.161 | 0.198   | 0.031  | 0.160      | 0.176  | 0.202       | 0.090    | 1.000  | 0.155 | 0.158  | 0.147        | 0.146           |
| Eggs            | 0.449   | 0.037 | 0.360 | 0.427   | 0.114  | 0.459      | 0.466  | 0.288       | 0.363    | 0.155  | 1.000 | 0.372  | 0.363        | 0.363           |
| Sweets          | 0.745   | 0.067 | 0.497 | 0.551   | 0.165  | 0.678      | 0.646  | 0.328       | 0.287    | 0.158  | 0.372 | 1.000  | 0.703        | 0.659           |
| Sweet_drinks    | 0.769   | 0.071 | 0.460 | 0.538   | 0.153  | 0.646      | 0.646  | 0.292       | 0.308    | 0.147  | 0.363 | 0.703  | 1.000        | 0.669           |
| Processed foods | 0.630   | 0.095 | 0.350 | 0.450   | 0.161  | 0.601      | 0.556  | 0.298       | 0.292    | 0.146  | 0.363 | 0.659  | 0.669        | 1.000           |
